# Supplementary material for: Performance of generative pre-trained transformers (GPTs) in Certification Examination of the College of Family Physicians of Canada
Source: PubMed Central journal article supplement — Fam Med Community Health. 2024 May 28;12(Suppl 1):e002626. doi: 10.1136/fmch-2023-002626 (PMC11138270; doi:10.1136/fmch-2023-002626), 2024-05-28
Supplement: fmch-2023-002626supp001.pdf [file fmch-2023-002626supp001.pdf]

**Appendix:**

Text box 1. Sample CFPC question (37) with GPT -3.5 and GPT -4 answers in 5 rounds and scoring. See table 2 for the prompts. Round 5 was without any prompt and provided comprehensive answers.

**Case 2784 (37):**

You are on call at the emergency department (ED) of a rural hospital. The nurse tells you a very anxious woman is on the phone. The woman wants to speak to you about her 2-year-old daughter. The daughter has ingested some poison. She is asymptomatic and appears well.

Question 1:

Other than demographic information, what important initial pieces of information must you elicit from the woman over the phone? List FIVE.

**CFPC Answer Key (37):**

Child's weight

Child's past medical history

Time of ingestion

Type of exposure / Name of the product ingested

Amount of exposure

**Category of Question: Difficult****GPT -3.5 Answers:****ROUND 1**

Name and age of child.

Name of ingested substance.

Quantity and time of ingestion.

Any symptoms or changes observed.

Contact information and location.

**ROUND 2**

Substance ingested,

amount,

time,

child's weight,

symptoms.

**ROUND 3**

Substance ingested,

amount,

time,

child's weight,

symptoms.

**ROUND 4**

Ingested substance,

amount,

time,

symptoms,

medical history.

**ROUND 5**

In a situation like this, it's crucial to gather as much relevant information as possible to assess the severity of the situation and provide appropriate guidance. Here are five important initial pieces of information to elicit from the woman over the phone:

1. **Substance Ingested:** Ask the woman to identify the specific poison or substance that the child ingested. This will help determine the potential toxicity and appropriate course of action.
2. **Amount Ingested:** Inquire about the approximate quantity or dose of the substance ingested. The amount consumed can affect the severity of potential symptoms.
3. **Time of Ingestion:** Determine when the child ingested the poison. The timing is essential for assessing the urgency of the situation and deciding on appropriate intervention timelines.
4. **Any Symptoms:** Ask the woman if the child is showing any signs of symptoms, such as vomiting, nausea, dizziness, or any other unusual behavior. This information will help gauge the current impact of the ingested substance.
5. **Child's Medical History:** Inquire about any pre-existing medical conditions, allergies, or medications the child might be taking. This information can influence how the body responds to the ingested substance. Remember, these initial pieces of information will help you make a preliminary assessment of the situation and guide your decision-making process regarding the next steps for the child's care.

**Reviewers rational for CFPC and Reviewer's Score:****ROUND 1:**

- "Quantity and time of ingestion" are given in the CFPC answer key as: "Amount of exposure" and "Time of ingestion" (2 CFPC score, 2 Reviewers' Score)
- "Name and age of child" is not in the in the CFPC answer Key but is a correct answer (0 CFPC Score, 1 Reviewer's Score)
- "Name of ingested substance" is given in the CFPC answer key as "Name of the product ingested" (1 CFPC Score, 1 Reviewer's Score)
- "Any symptoms or changes observed" is not in the in the CFPC answer Key but is a correct answer (0 CFPC Score, 1 Reviewer's Score)
- "Contact information and location" is not in the in the CFPC answer Key but is a correct answer (0 CFPC Score, 1 Reviewer's Score)

**Conclusion:**

CFPC Score to this Round is 3.

Reviewers' Score to this Round is 5.

**ROUND 2**

- "Substance ingested" is given in the CFPC answer key as "Name of the product ingested" (1 CFPC Score, 1 Reviewer's Score)
- "amount" is given in the CFPC answer key as: "Amount of exposure" (1 CFPC Score, 1 Reviewer's Score)
- "time" is given in the CFPC answer key as "Time of ingestion" (1 CFPC score, 1 Reviewers' Score)
- "child's weight" is given in the CFPC answer key as "Child's weight" (1 CFPC score, 1 Reviewers' Score)
- "symptoms" is not in the in the CFPC answer Key but is a correct answer (0 CFPC Score, 1 Reviewer's Score)

**Conclusion:**

CFPC Score to this Round is 4.

Reviewers' Score to this Round is 5.

**ROUND 3**

- "Substance ingested" is given in the CFPC answer key as "Name of the product ingested" (1 CFPC Score, 1 Reviewer's Score)
- "amount" is given in the CFPC answer key as: "Amount of exposure" (1 CFPC Score, 1 Reviewer's Score)

- "time" is given in the CFPC answer key as "Time of ingestion" (1 CFPC score, 1 Reviewers' Score)
- "child's weight" is given in the CFPC answer key as "Child's weight" (1 CFPC score, 1 Reviewers' Score)
- "symptoms" is not in the in the CFPC answer Key but is a correct answer (0 CFPC Score, 1 Reviewer's Score)

Conclusion:

CFPC Score to this Round is 4.

Reviewers' Score to this Round is 5.

#### ROUND 4

- "Ingested substance" is given in the CFPC answer key as "Name of the product ingested" (1 CFPC Score, 1 Reviewer's Score)
- "amount" is given in the CFPC answer key as: "Amount of exposure" (1 CFPC Score, 1 Reviewer's Score)
- "time" is given in the CFPC answer key as "Time of ingestion" (1 CFPC score, 1 Reviewers' Score)
- "symptoms" is not in the in the CFPC answer Key but is a correct answer (0 CFPC Score, 1 Reviewer's Score)
- "medical history" is given in the CFPC answer key as "Child's past medical history" (1 CFPC score, 1 Reviewers' Score)

Conclusion:

CFPC Score to this Round is 4.

Reviewers' Score to this Round is 5.

#### ROUND 5

- "Substance Ingested" is given in the CFPC answer key as "Name of the product ingested" (1 CFPC Score, 1 Reviewer's Score)
- "Amount Ingested" is given in the CFPC answer key as: "Amount of exposure" (1 CFPC Score, 1 Reviewer's Score)
- "Time of Ingestion" is given in the CFPC answer key as "Time of ingestion" (1 CFPC score, 1 Reviewers' Score)
- "Any Symptoms" is not in the in the CFPC answer Key but is a correct answer (0 CFPC Score, 1 Reviewer's Score)
- "Child's Medical History" is given in the CFPC answer key as "Child's past medical history" (1 CFPC score, 1 Reviewers' Score)

Conclusion:

CFPC Score to this Round is 4.

Reviewers' Score to this Round is 5.

#### Summary of Scoring GPT -3.5

| Total=5                 | ROUND-1                      | ROUND-2                      | ROUND-3                      | ROUND-4                      | ROUND-5                      |
|-------------------------|------------------------------|------------------------------|------------------------------|------------------------------|------------------------------|
| <b>CFPC Score</b>       | 3                            | 4                            | 4                            | 4                            | 4                            |
| <b>Reviewers' score</b> | 5                            | 5                            | 5                            | 5                            | 5                            |
| <b>Repeated answer</b>  | 4 R2<br>4 R3<br>4 R4<br>3 R5 | 4 R1<br>5 R3<br>5 R4<br>4 R5 | 4 R1<br>5 R2<br>5 R4<br>4 R5 | 4 R1<br>5 R2<br>5 R3<br>5 R5 | 3 R1<br>4 R2<br>4 R3<br>5 R4 |

#### GPT -4

##### ROUND 1

Substance ingested.

Quantity ingested.

Time of ingestion.

Any observed symptoms.

Child's current weight.

**ROUND 2**

Substance ingested and its concentration.

Amount of substance ingested.

Time since ingestion.

Any symptoms observed.

Past medical history of the child.

**ROUND 3**

Type of poison ingested.

Quantity ingested.

Time since ingestion.

Presence of any symptoms.

Any prior interventions/treatments given.

**ROUND 4**

Substance ingested.

Time of ingestion.

Amount ingested.

Weight of child.

Pre-existing medical conditions.

**ROUND 5**

I'm not a healthcare professional, but in a situation where a child has ingested a poisonous substance, timely and accurate information is crucial for proper medical intervention. Here are five important pieces of information you might want to elicit from the mother over the phone:

**Type of Poison:** Knowing what the child has ingested is crucial. Is it a household cleaning agent, a medication, a plant, or some other toxic substance? The specific type of poison will determine the appropriate course of treatment.

**Amount and Concentration:** Understanding the approximate quantity and concentration of the ingested poison will help in assessing the severity of the situation and planning appropriate medical intervention.

**Time of Ingestion:** How much time has elapsed since the child ingested the poison? This information will help medical professionals to gauge how urgently medical intervention is needed, and whether there is still a window for certain treatments, like activated charcoal, to be effective.

**Current Symptoms:** Although the child appears well at the moment, any subtle changes in behavior, level of consciousness, breathing, or other physical symptoms need to be noted. This can help assess whether the poisoning is progressing or has reached a certain level of severity.

**Child's Weight:** The child's weight can influence how the poison affects them. Certain antidotes or medical interventions may also be weight-based. Having this information can help in deciding both the urgency and nature of medical treatment.

Prompt assessment and relay of this information can significantly aid in rapid and effective medical treatment. Always consult with healthcare professionals for accurate diagnosis and appropriate management.

**Reviewers rational for CFPC and Reviewer's Score****ROUND 1:**

- "Substance ingested" is given in the CFPC answer key as "Name of the product ingested" (1 CFPC Score, 1 Reviewer's Score)

- "Quantity ingested" is given in the CFPC answer key as: "Amount of exposure" (1 CFPC Score, 1 Reviewer's Score)

- "Time of ingestion" is given in the CFPC answer key as "Time of ingestion" (1 CFPC score, 1 Reviewers' Score)

- "Any observed symptoms" is not in the in the CFPC answer Key but is a correct answer (0 CFPC Score, 1 Reviewer's Score)

- "Child's current weight" is given in the CFPC answer key as "Child's weight" (1 CFPC score, 1 Reviewers' Score)

**Conclusion:**

CFPC Score to this Round is 4.

Reviewers' Score to this Round is 5.

**ROUND 2**

- "Substance ingested and its concentration" is given in the CFPC answer key as "Name of the product ingested" (1 CFPC Score, 1 Reviewer's Score)

- "Amount of substance ingested" is given in the CFPC answer key as: "Amount of exposure" (1 CFPC Score, 1 Reviewer's Score)

- "Time since ingestion" is given in the CFPC answer key as "Time of ingestion" (1 CFPC score, 1 Reviewers' Score)

- "Any symptoms observed" is not in the in the CFPC answer Key but is a correct answer (0 CFPC Score, 1 Reviewer's Score)

- "Past medical history of the child" is given in the CFPC answer key as "Child's past medical history" (1 CFPC score, 1 Reviewers' Score)

**Conclusion:**

CFPC Score to this Round is 4.

Reviewers' Score to this Round is 5.

**ROUND 3**

- "Type of poison ingested" is given in the CFPC answer key as "Name of the product ingested" (1 CFPC Score, 1 Reviewer's Score)

- "Quantity ingested" is given in the CFPC answer key as: "Amount of exposure" (1 CFPC Score, 1 Reviewer's Score)

- "Time since ingestion" is given in the CFPC answer key as "Time of ingestion" (1 CFPC score, 1 Reviewers' Score)

- "Presence of any symptoms" is not in the in the CFPC answer Key but is a correct answer (0 CFPC Score, 1 Reviewer's Score)

- "Any prior interventions/treatments given" is not in the in the CFPC answer Key but is a correct answer (0 CFPC Score, 1 Reviewer's Score)

**Conclusion:**

CFPC Score to this Round is 3.

Reviewers' Score to this Round is 5.

**ROUND 4**

- "Substance ingested" is given in the CFPC answer key as "Name of the product ingested" (1 CFPC Score, 1 Reviewer's Score)

- "Time of ingestion" is given in the CFPC answer key as "Time of ingestion" (1 CFPC score, 1 Reviewers' Score)

- "Amount ingested" is given in the CFPC answer key as: "Amount of exposure" (1 CFPC Score, 1 Reviewer's Score)

- "Weight of child" is given in the CFPC answer key as: "Child's weight" (1 CFPC Score, 1 Reviewer's Score)

- "Pre-existing medical conditions" is given in the CFPC answer key as: "Child's past medical history" (1 CFPC Score, 1 Reviewer's Score)

**Conclusion:**

CFPC Score to this Round is 5.

Reviewers' Score to this Round is 5.

#### ROUND 5

- "Type of Poison" is given in the CFPC answer key as "Name of the product ingested" (1 CFPC Score, 1 Reviewer's Score)
- "Amount and Concentration" is given in the CFPC answer key as: "Amount of exposure" (1 CFPC Score, 1 Reviewer's Score)
- "Time of Ingestion" is given in the CFPC answer key as "Time of ingestion" (1 CFPC score, 1 Reviewers' Score)
- "Current Symptoms" is not in the in the CFPC answer Key but is a correct answer (0 CFPC Score, 1 Reviewer's Score)
- "Child's Weight" is given in the CFPC answer key as: "Child's weight" (1 CFPC Score, 1 Reviewer's Score)

#### Conclusion:

CFPC Score to this Round is 4.

Reviewers' Score to this Round is 5.

#### Summary of Scoring GPT -4

| Total Possible Scores= 5 | ROUND-1                      | ROUND-2                      | ROUND-3                      | ROUND-4                      | ROUND-5                      |
|--------------------------|------------------------------|------------------------------|------------------------------|------------------------------|------------------------------|
| CFPC Score               | 4                            | 4                            | 3                            | 5                            | 4                            |
| Reviewers' Score         | 5                            | 5                            | 5                            | 5                            | 5                            |
| Repeated Answer          | 4 R2<br>3 R3<br>4 R4<br>5 R5 | 4 R1<br>4 R3<br>4 R4<br>4 R5 | 3 R1<br>4 R2<br>3 R4<br>3 R5 | 4 R1<br>4 R2<br>3 R3<br>4 R5 | 5 R1<br>4 R2<br>3 R3<br>4 R4 |
